# Supplementary material for: Kidney Function Trajectory within Six Months after Acute Kidney Injury Inpatient Care and Subsequent Adverse Kidney Outcomes: A Retrospective Cohort Study
Source: MDPI journal article supplement (doi:10.3390/jpm12101606), 2022-09-29
Supplement: s1 [file s1]

## Supplementary Materials

Supplemental Figure S1: Conceptual analytic model of AKI recovery evaluation

Supplemental Table S1. Characteristics of the patient cohort that survived 3 months after index hospital discharge

Supplemental Table S2. Characteristics of the study cohort that survived 6 months after index hospital discharge in the kidney trajectory analysis

Supplemental Table S3. Excluded patients with adverse kidney outcome event within 6 months after index hospital discharge (n=16,699)

Supplemental Table S4. Mean estimated glomerular filtration rates from pre- and post-hospitalization period in the study cohort that survived 6 months after index hospital discharge in the kidney function trajectory analysis (n=65,056)

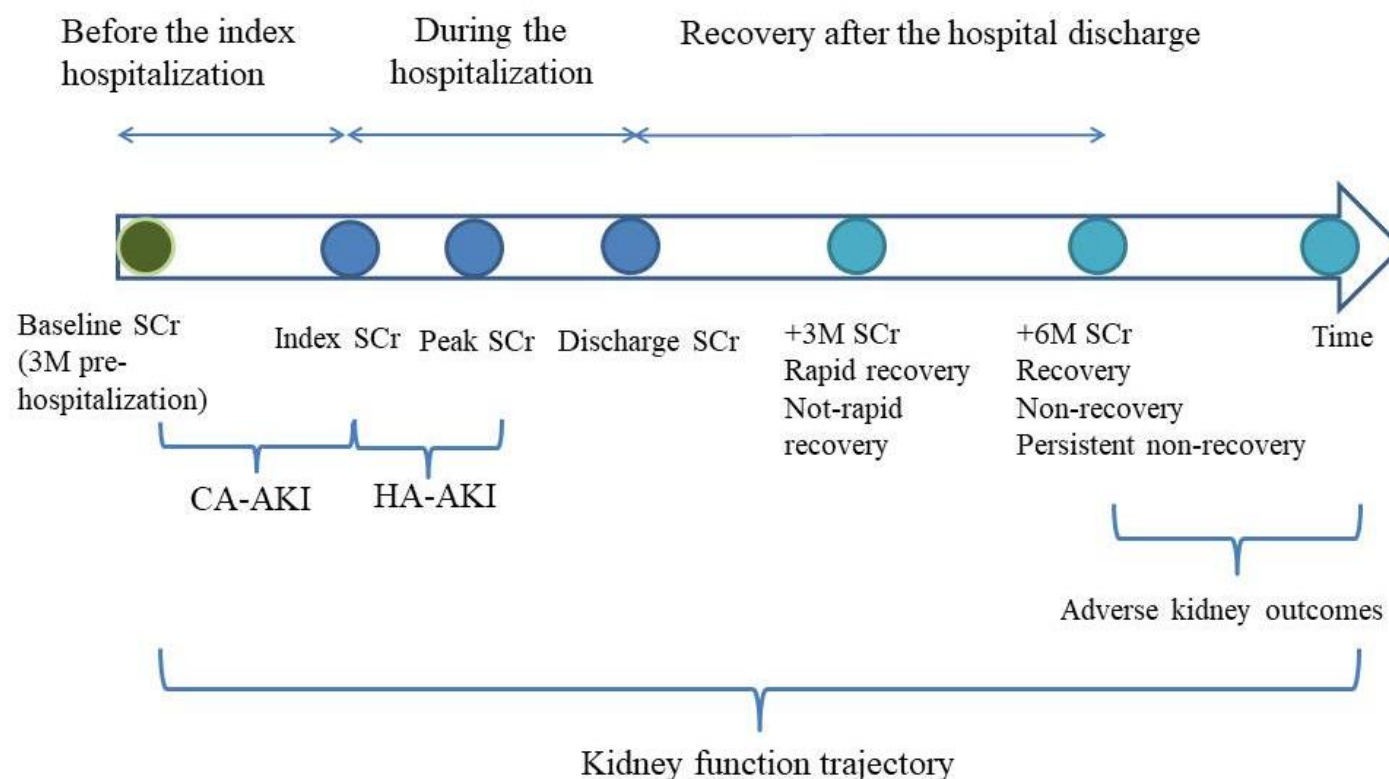

Supplemental Figure S1: Conceptual analytic model of AKI recovery evaluation after 3- and 6-month from acute kidney injury hospital discharge. SCr: serum creatinine; CA-AKI: community-acquired acute kidney injury; HA-AKI: hospital-acquired acute kidney injury; Rapid recovery (+3M SCr < 1.5 × baseline SCr); Recovery AKI: +6M SCr < 1.5 × baseline SCr)

Supplemental Table S1: Characteristics of the patient cohort that survived 3 months after index hospital discharge

|                                            | Overall<br>(n=1,08,449) | Not-rapid<br>recovery<br>(n=3,425) | Rapid recovery<br>(n=20,695) | No AKI<br>(n=84,329) | <i>p</i> value |
|--------------------------------------------|-------------------------|------------------------------------|------------------------------|----------------------|----------------|
| Age at index admission, years, n (%)       |                         |                                    |                              |                      | <.001          |
| <65                                        | 59578                   | 1738 (50.74)                       | 9740 (47.06)                 | 48100 (57.04)        |                |
| ≥65                                        | 48871                   | 1687 (49.26)                       | 10955 (52.94)                | 36229 (42.96)        |                |
| Sex, n (%)                                 |                         |                                    |                              |                      | <.001          |
| Male                                       | 60705                   | 1799 (52.53)                       | 11378 (54.98)                | 47528 (56.36)        |                |
| Female                                     | 47744                   | 1626 (47.47)                       | 9317 (45.02)                 | 36801 (43.64)        |                |
| Dialysis before index admission, n (%)     | 246                     | 37 (1.08)                          | 199 (0.96)                   | 10 (0.01)            | <.001          |
| Baseline comorbidity, n (%)                |                         |                                    |                              |                      | <.001          |
| CCI group                                  |                         |                                    |                              |                      |                |
| 0                                          | 24707                   | 408 (11.91)                        | 2737 (13.23)                 | 21562 (25.57)        |                |
| 1~3                                        | 53156                   | 1473 (43.01)                       | 9999 (48.32)                 | 41684 (49.43)        |                |
| >3                                         | 30586                   | 1544 (45.08)                       | 7959 (38.46)                 | 21083 (25.00)        |                |
| AKI occurred, n (%)                        |                         |                                    |                              |                      | -              |
| No AKI                                     | 84329                   | -                                  | -                            | 84329                |                |
| CA-AKI only (at admission)                 | 9509                    | 2030 (59.27)                       | 7479 (36.14)                 | -                    |                |
| HA-AKI only (during hospitalization)       | 13775                   | 1075 (31.39)                       | 12700 (61.37)                | -                    |                |
| CA- and HA-AKI                             | 836                     | 320 (9.34)                         | 516 (2.49)                   | -                    |                |
| Health service uses during hospitalization |                         |                                    |                              |                      |                |
| Dialysis                                   | 2303                    | 364 (10.63)                        | 1806 (8.73)                  | 133 (0.16)           | <.001          |
| Intensive care unit                        | 11888                   | 513 (14.98)                        | 3324 (16.06)                 | 8051 (9.55)          | <.001          |
| <b>Mean (SD)</b>                           |                         |                                    |                              |                      |                |
| Age at index admission, year               | 108449                  | 63.23 (15.30)                      | 64.59 (15.40)                | 61.34 (14.94)        | <.001          |
| Baseline eGFR, ml/min/1.73m <sup>2</sup>   | 108449                  | 85.90 (59.13)                      | 64.02 (45.13)                | 81.28 (33.15)        | <.001          |
| Number of outpatient visit                 | 108449                  | 5.48 (4.83)                        | 5.68 (6.18)                  | 5.08 (4.10)          | <.001          |
| Number of emergency department visit       | 108449                  | 0.77 (1.10)                        | 0.80 (1.18)                  | 0.48 (0.92)          | <.001          |
| Number of hospitalization                  | 108449                  | 0.54 (0.72)                        | 0.45 (0.65)                  | 0.40 (0.64)          | <.001          |

CCI: Charlson comorbid index; CA-AKI: community-acquired AKI; HA-AKI: hospital-acquired AKI; Baseline eGFR, number of outpatient visit, emergency department and hospitalization were retrieved <3months before the index hospitalization; SD: standard deviation; *p* value for three groups' comparison: Chi-squared test for categorical data and ANOVA for continuous data.

Supplemental Table S2: Characteristics of the study cohort that survived 6 months after index hospital discharge in the kidney function trajectory analysis

|                                                                   | Overall<br>(n=65,056) | Persistent<br>non-recovery<br>(n=1,493) | Non-recovery<br>(n=2,102) | Recovery<br>(n=11,078) | No AKI<br>(n=50,383) | P value |
|-------------------------------------------------------------------|-----------------------|-----------------------------------------|---------------------------|------------------------|----------------------|---------|
| Age at index date, years, n (%)                                   |                       |                                         |                           |                        |                      | <0.001  |
| <65                                                               | 36812                 | 836 (55.99)                             | 1026 (48.81)              | 5481 (49.48)           | 29469 (58.49)        |         |
| ≥65                                                               | 28244                 | 657 (44.01)                             | 1076 (51.19)              | 5597 (50.52)           | 20914 (41.51)        |         |
| Sex, n (%)                                                        |                       |                                         |                           |                        |                      | <0.001  |
| Male                                                              | 36088                 | 752 (50.37)                             | 1138 (54.14)              | 5986 (54.04)           | 28212 (56.00)        |         |
| Female                                                            | 28968                 | 741 (49.63)                             | 964 (45.86)               | 5092 (45.96)           | 22171 (44.00)        |         |
| Dialysis before index date, n (%)                                 | 132                   | 22 (1.47)                               | 12 (0.57)                 | 92 (0.83)              | 6 (0.01)             | <0.001  |
| Baseline eGFR, ml/min/1.73m <sup>2</sup> , n (%)                  |                       |                                         |                           |                        |                      | <.0001  |
| ≥60                                                               | 44113                 | 887 (59.41)                             | 1106 (52.62)              | 5237 (47.70)           | 36883 (73.21)        |         |
| <60                                                               | 20943                 | 606 (40.59)                             | 996 (47.38)               | 5841 (52.73)           | 13500 (26.79)        |         |
| Baseline comorbidity, n (%)                                       |                       |                                         |                           |                        |                      |         |
| CCI score                                                         |                       |                                         |                           |                        |                      | <0.001  |
| 0                                                                 | 11905                 | 160 (10.72)                             | 163 (7.75)                | 1191 (10.75)           | 10391 (20.62)        |         |
| 1~3                                                               | 32319                 | 633 (42.40)                             | 878 (41.77)               | 5420 (48.93)           | 25388 (50.39)        |         |
| >3                                                                | 20832                 | 700 (46.89)                             | 1061 (50.48)              | 4467 (40.32)           | 14604 (28.99)        |         |
| <b>During hospitalization, n (%)</b>                              |                       |                                         |                           |                        |                      |         |
| In-hospital dialysis                                              | 1504                  | 194 (12.99)                             | 181 (8.61)                | 1060 (9.57)            | 69 (0.14)            | <0.001  |
| Intensive care                                                    | 6575                  | 232 (15.54)                             | 322 (15.32)               | 1645 (14.85)           | 4376 (8.69)          | <0.001  |
| AKI occurred, n (%)                                               |                       |                                         |                           |                        |                      |         |
| CA-AKI only (at admission)                                        | 6014                  | 957 (64.10)                             | 1027 (48.86)              | 4030 (36.38)           | -                    |         |
| HA-AKI only (during hospitalization)                              | 8153                  | 377 (25.25)                             | 987 (46.96)               | 6789 (61.28)           | -                    |         |
| CA- and HA-AKI                                                    | 506                   | 159 (10.65)                             | 88 (4.19)                 | 259 (2.34)             | -                    |         |
| <b>Recovery at 3 months after index hospital discharge, n (%)</b> |                       |                                         |                           |                        |                      |         |
| Not-rapid recovery                                                | 1911                  | 1493                                    | -                         | 418 (3.77)             | -                    |         |
| Rapid recovery                                                    | 12762                 | -                                       | 2102                      | 10660 (96.23)          | -                    |         |
| <b>Mean (SD)</b>                                                  |                       |                                         |                           |                        |                      |         |
| Age at index hospital admission                                   | 65056                 | 61.47 (14.85)                           | 64.34 (15.03)             | 63.82 (15.03)          | 61.12 (14.27)        | <0.001  |
| Baseline eGFR                                                     | 65056                 | 86.72 (63.94)                           | 72.03 (54.38)             | 60.93 (43.81)          | 81.02 (33.50)        | <0.001  |
| Sum number of prior medications classes                           | 65056                 | 2.18 (1.62)                             | 2.31 (1.59)               | 2.29 (1.59)            | 1.78 (1.50)          | <.0001  |
| Analgesics (NSAID, Opioids)                                       | 19392                 | 421 (28.20)                             | 607 (28.88)               | 3690 (33.31)           | 14674 (29.12)        | <.0001  |
| Antimicrobial                                                     | 16244                 | 469 (31.41)                             | 640 (30.45)               | 3584 (32.35)           | 11551 (22.93)        | <.0001  |
| Antiepileptics                                                    | 429                   | 14 (0.94)                               | 13 (0.62)                 | 102 (0.92)             | 300 (0.60)           | 0.0009  |
| Antihypertension (RASi/diuretics)                                 | 20344                 | 601 (40.25)                             | 901 (42.86)               | 4384 (39.57)           | 14458 (28.70)        | <.0001  |
| Contrast media                                                    | 4726                  | 72 (4.82)                               | 68 (3.24)                 | 502 (4.53)             | 4084 (8.11)          | <.0001  |
| Antihyperglycemia                                                 | 15855                 | 395 (26.46)                             | 644 (30.64)               | 3206 (28.94)           | 11610 (23.04)        | <.0001  |
| Calcineurin inhibitors /                                          | 4636                  | 150 (10.05)                             | 154 (7.33)                | 784 (7.08)             | 3548 (7.04)          | 0.0002  |

|                                                      |       |             |             |              |              |        |
|------------------------------------------------------|-------|-------------|-------------|--------------|--------------|--------|
| methotrexate                                         |       |             |             |              |              |        |
| Uric acid lowering agent                             | 4573  | 136 (9.11)  | 255 (12.13) | 1310 (11.83) | 2872 (5.70)  | <.0001 |
| Anti-inflammation/intestine                          | 569   | 4 (0.27)    | 7 (0.33)    | 91 (0.82)    | 467 (0.93)   | 0.0015 |
| Antihistamines/<br>Antipsychotics/<br>Antispasmodics | 13523 | 373 (24.98) | 579 (27.55) | 2884 (26.03) | 9687 (19.23) | <.0001 |
| Bisphosphonates                                      | 264   | 3 (0.20)    | 9 (0.43)    | 56 (0.51)    | 196 (0.39)   | 0.1991 |
| Digoxin                                              | 937   | 25 (1.67)   | 54 (2.57)   | 218 (1.97)   | 640 (1.27)   | <.0001 |
| Statins/fibrates                                     | 11740 | 283 (18.96) | 420 (19.98) | 2373 (21.42) | 8664 (17.20) | <.0001 |
| Lithium                                              | 44    | 0 (0.00)    | 2 (0.10)    | 12 (0.11)    | 30 (0.06)    | 0.2170 |
| Nitrates                                             | 4277  | 166 (11.12) | 254 (12.08) | 1081 (9.76)  | 2776 (5.51)  | <.0001 |
| Anticoagulants (oral and heparin)                    | 5751  | 145 (9.71)  | 239 (11.37) | 1097 (9.90)  | 4270 (8.48)  | <.0001 |

CCI: Charlson comorbid index; CA-AKI: community-acquired AKI; HA-AKI: hospital-acquired AKI; NSAIDs: nonsteroidal antiinflammatory drug; RASi: Renin-angiotensin-aldosterone system inhibitor; Baseline eGFR, number of medical encounters (outpatient visit, emergency department, and hospitalization), 16 pharmacological classes of medications for drug-induced kidney disease were retrieved <3 months before the index hospitalization; SD: standard deviation; *p* value for three groups' comparison: Chi-squared test for categorical data and ANOVA for continuous data

Supplemental Table S3. Excluded patients with adverse kidney outcomes within 6 months after index hospital discharge (n=16,699)

|                                                  | Overall<br>(n=16,699) | Persistent<br>non-recovery<br>(n=949) | Non-recovery<br>(n=1,137) | Recovery<br>(n=3,715) | No AKI<br>(n=10,898) |
|--------------------------------------------------|-----------------------|---------------------------------------|---------------------------|-----------------------|----------------------|
| Patient excluded, % of 6M cohort                 | 25.67%                | 45.15%                                | 54.09%                    | 33.53%                | 21.63%               |
| Baseline eGFR, ml/min/1.73m <sup>2</sup> , n (%) |                       |                                       |                           |                       |                      |
| ≥60                                              | 10570                 | 511 (53.85)                           | 489 (43.01)               | 1216 (32.73)          | 8354 (76.66)         |
| <60                                              | 6129                  | 438 (46.15)                           | 648 (56.99)               | 2499 (67.27)          | 2544 (23.34)         |
| Outcomes of interest, n (%)                      |                       |                                       |                           |                       |                      |
| eGFR reduction >30% baseline                     | 3829                  | 825 (86.93)                           | 564 (49.60)               | 517 (13.92)           | 1923 (17.65)         |
| eGFR <15 ml/min/1.73m <sup>2</sup>               | 3001                  | 393 (41.41)                           | 429 (37.73)               | 1722 (46.35)          | 457 (4.19)           |
| Kidney replacement therapy                       | 1399                  | 151 (15.91)                           | 154 (13.54)               | 795 (21.40)           | 299 (2.74)           |
| Incident CKD                                     | 2211                  | 405 (42.68)                           | 135 (11.87)               | 168 (4.52)            | 1503 (13.79)         |

To avoid bias, 16,699 patients who developed events of interests ≤ 180 days were excluded from further analyses for the risk of incident adverse kidney outcomes.

Supplemental Table S4. Mean estimated glomerular filtration rates from pre- and post-hospitalization period in the study cohort that survived 6 months after index hospital discharge in the kidney function trajectory analysis (n=65,056)

| 6-month                          | Baseline | Index admission | During Hospitalization | Discharge | Post-3M | Post-6M | Post-12M | Post-24M | Post-36M | Post-48M | Post-60M | Post-72M | Post-84M |
|----------------------------------|----------|-----------------|------------------------|-----------|---------|---------|----------|----------|----------|----------|----------|----------|----------|
| Persistent non-recovery (n=1493) | 86.72    | 50.83           | 34.99                  | 49.02     | 40.70   | 42.15   | 44.54    | 41.35    | 42.75    | 44.89    | 45.87    | 43.77    | 35.14    |
| Non-Recovery (n=2102 )           | 72.03    | 60.42           | 35.74                  | 65.68     | 64.51   | 51.04   | 49.59    | 45.87    | 45.01    | 46.59    | 44.37    | 40.78    | 39.63    |
| Recovery (n=11078)               | 60.93    | 65.56           | 36.05                  | 70.51     | 69.48   | 71.60   | 62.07    | 57.00    | 55.07    | 54.39    | 53.46    | 49.71    | 49.30    |
| No AKI (n=50383)                 | 81.02    | 80.68           | 70.54                  | 86.36     | 82.92   | 82.90   | 77.52    | 73.40    | 71.47    | 69.84    | 68.73    | 67.63    | 66.67    |

M= months; The number in the table is mean eGFR (ml/min/1.73m<sup>2</sup>) same as Figure 2 presents the kidney function trajectory.
